# Supplementary material for: Genetic variation of HvXYN1 associated with endoxylanase activity and TAX content in barley (Hordeum vulgare L.)
Source: PubMed Central journal article supplement (PMC6492322; doi:10.1186/s12870-019-1747-5), 2019-04-30
Supplement: 12870_2019_1747_MOESM2_ESM.pdf [file 12870_2019_1747_MOESM2_ESM.pdf]

### P-Values by position for EA activity

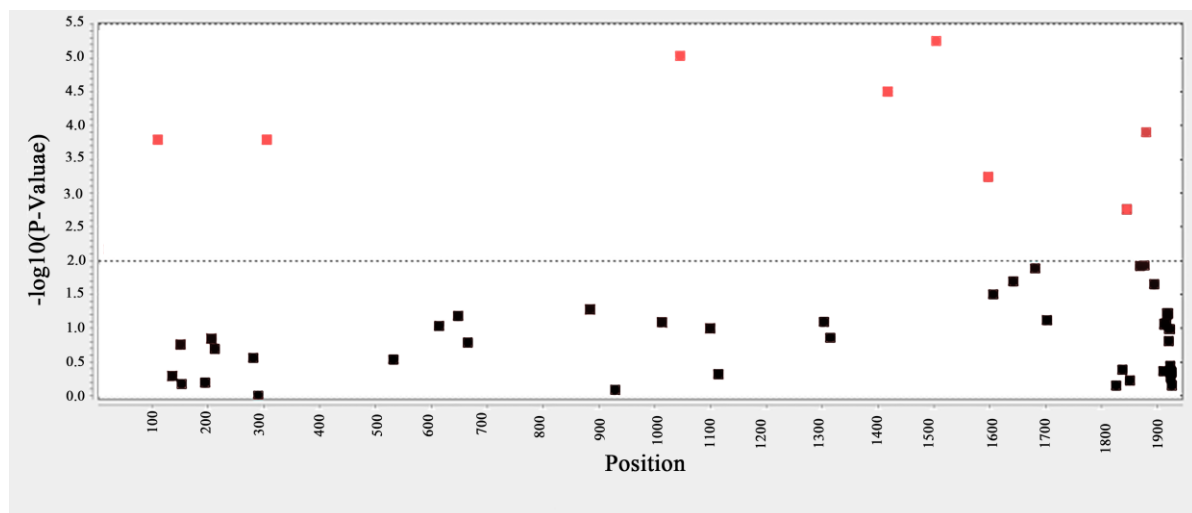

Figure S1
